# Supplementary material for: Climatic Feedbacks and Vegetation Changes Driven by Orbital Forcing and Sea Surface Temperature During Interglacials
Source: Copernicus journal article supplement (doi:10.5194/egusphere-2024-4143), 2025-01-24
Supplement: Supplementary file 1 [file egusphere-2024-4143-supplement.pdf]

# Climatic Feedbacks and Vegetation Changes Driven by Orbital Forcing and Sea Surface Temperature During Interglacials

Carlos Gurjão<sup>1</sup>, Flávio Justino<sup>1</sup>, Marcos Pereira<sup>2</sup>, and Mônica Senna<sup>3</sup>

<sup>1</sup>Department of Agricultural Engineering, Federal University of Viçosa, Viçosa-MG, Brazil

<sup>2</sup>Department of Meteorology, Federal University Alagoas, Maceió-AL, Brazil

<sup>3</sup>Biosystems Engineering, Federal University Fluminense, Niterói-RJ, Brazil

**Correspondence:** Carlos Gurjão (carlosdiegogurjao@gmail.com)

## 1 Supplementary

The supplementary material of this study provides essential additional information for a deeper understanding of the results presented in the main article. It includes detailed reconstructions of the South American biomes, highlighting the main classifications; Additionally, figures illustrating the spatial distribution of the mean seasonal differences in sea level pressure (SLP) between interglacial experiments, compared with sea surface temperature (SST) and precipitation from the control experiment (CTRL), are presented. The differences are shown for the MH-CTRL, MIS5e-CTRL, MIS11c-CTRL and MIS31-CTRL periods, highlighting statistically significant anomalies at the 95% confidence level; Finally, analyses of the Hadley circulation based on the summer (DJFM) and winter (JJAS) composite anomalies are also included, showing the differences between the MH-CTRL, MIS5e-CTRL and MIS11c-CTRL experiments. The figures use maps of meridional mass stream functions, with contour intervals representing fluxes.

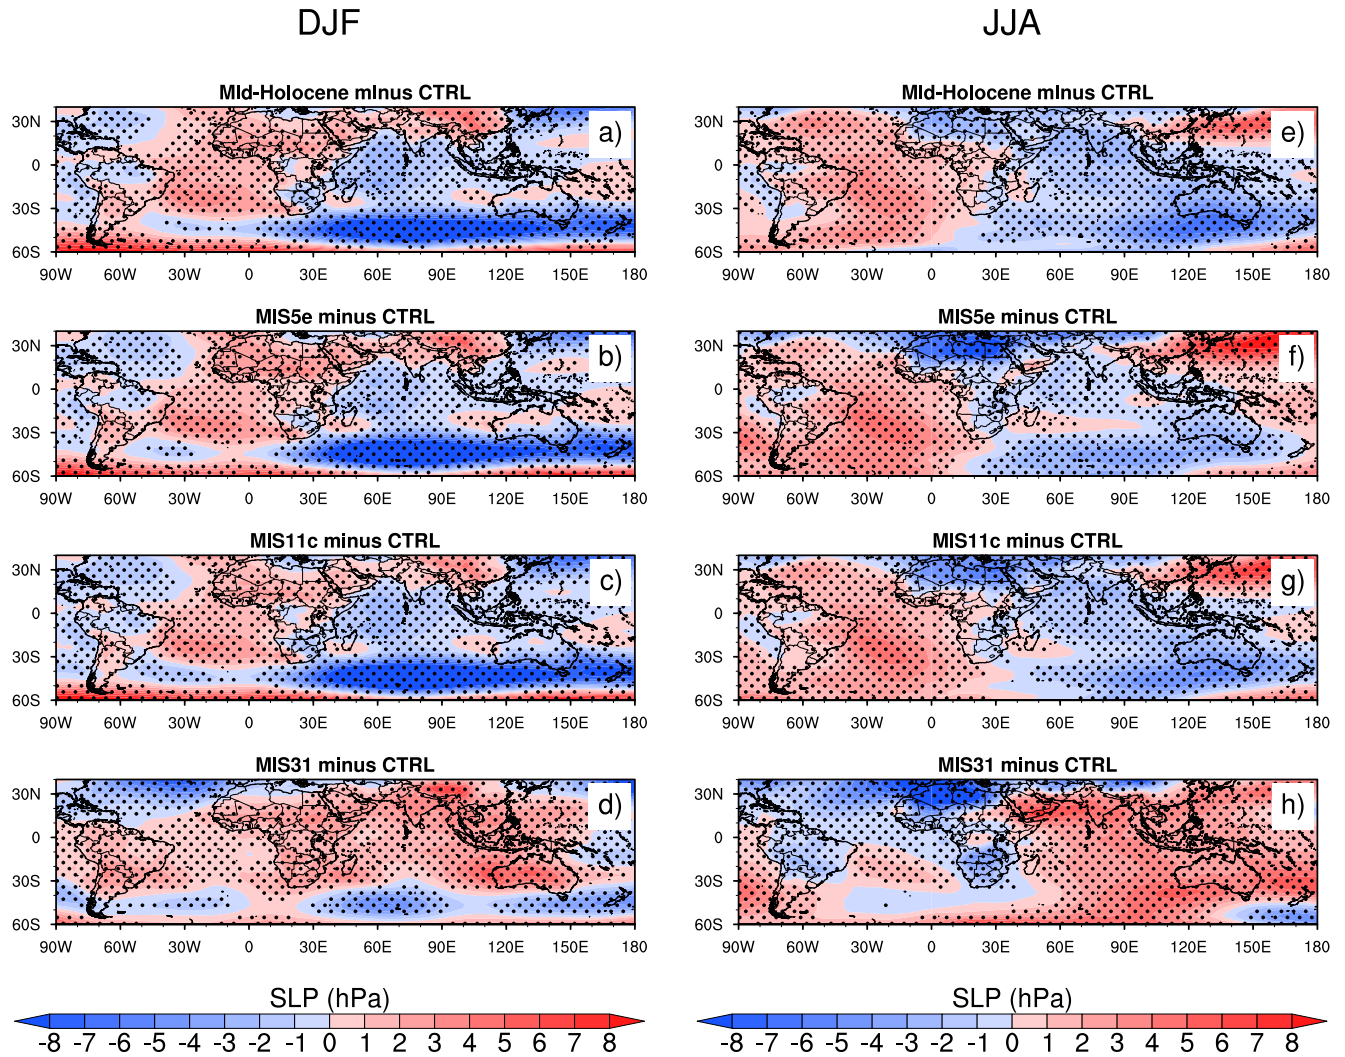

**Figure S1.** Spatial distribution of season (DJF and JJA) mean surface SLP difference between interglacials experiments compared to SST and precipitation from CTRL; MH minus CTRL (a,e), MIS5e minus CTRL (b,f), MIS11c minus CTRL (c,g) and MIS31 minus CTRL (d,h). Black dots represent correspond to statistically significant anomalies at the 95% confidence interval.

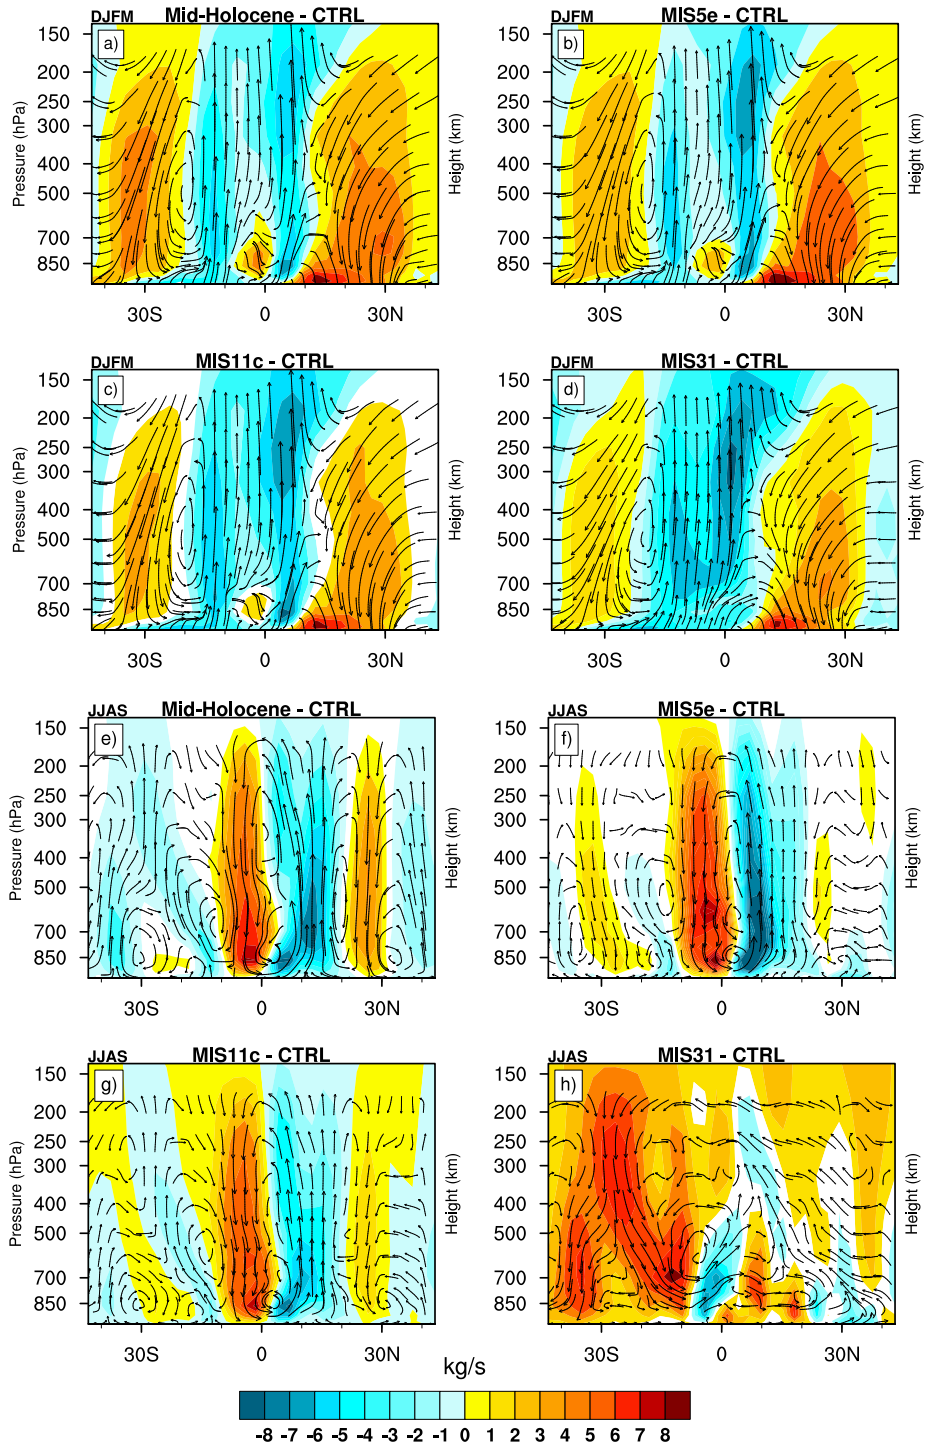

**Figure S2.** Hadley circulation from the difference between summer (DJFM) composite anomalies MH-CTRL (a), MIS5e-CTRL (b), MIS11c-CTRL (c) and MIS5e-CTRL (d); and winter (JJAS) MH-CTRL (e), MIS5e-CTRL (f), MIS11c-CTRL (g) and MIS5e-CTRL (h). Color bar indicates the value of mass stream function of mean meridional circulation. The contours intervals represents  $10^9$ kg/s.

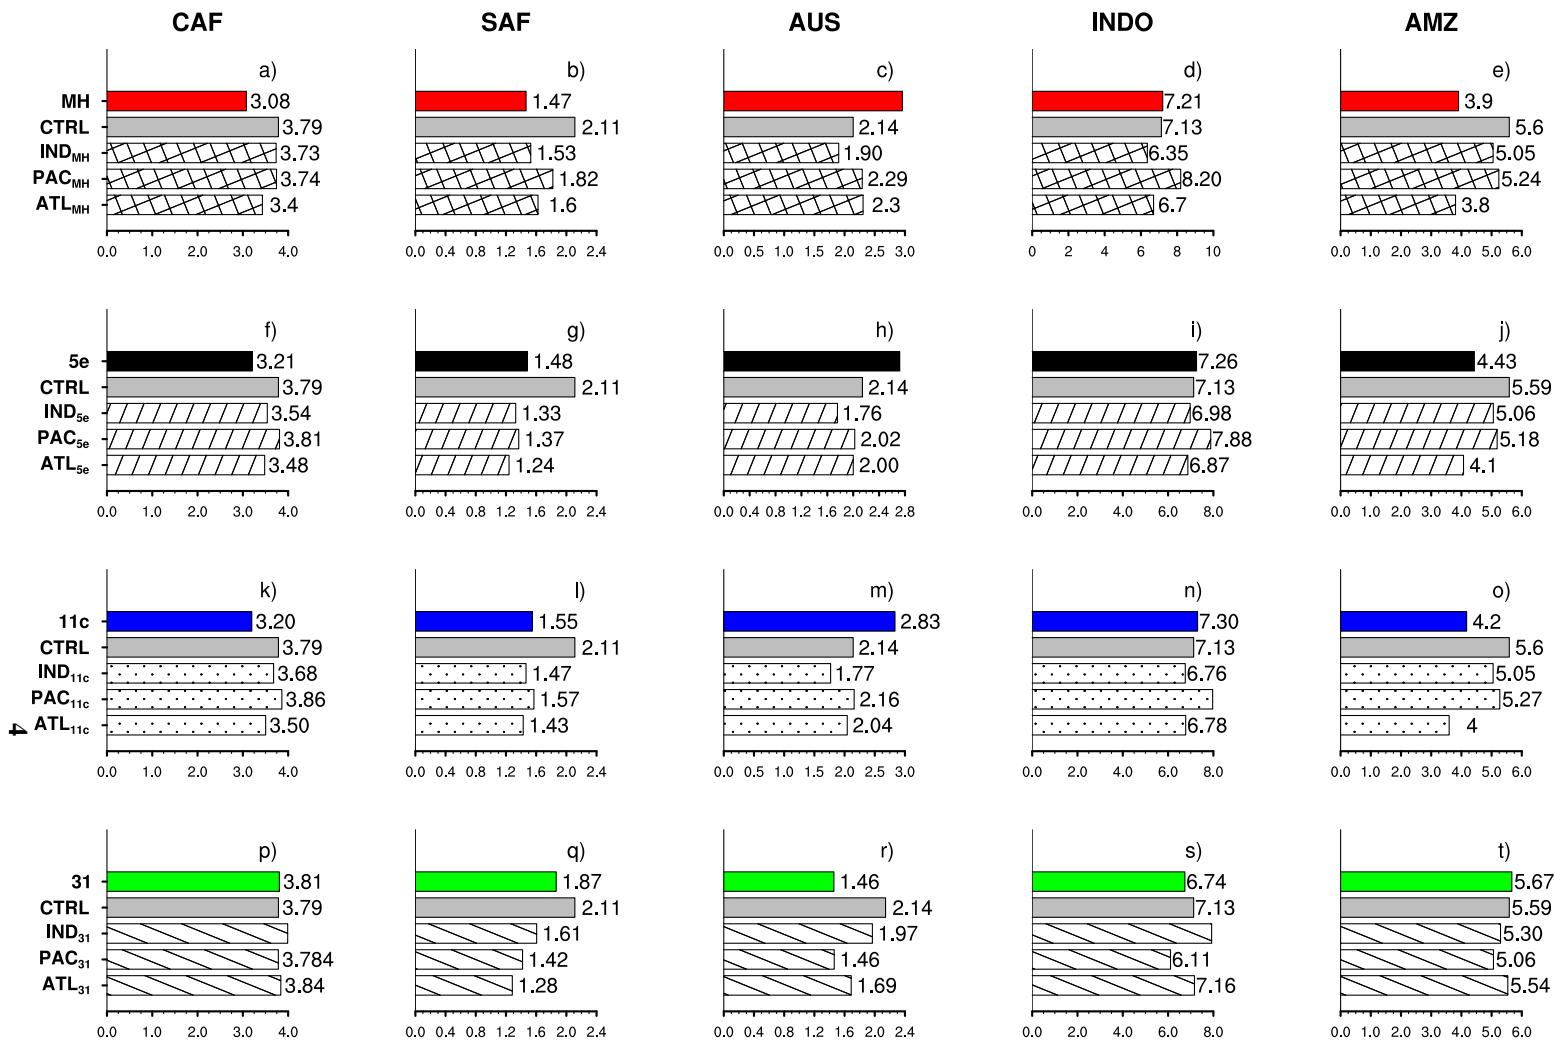

Figure S3. Areal averaged precipitation (mm/day) CAF, SAF, AUS, IND and AMZ, region for the SST sensitivity experiments.

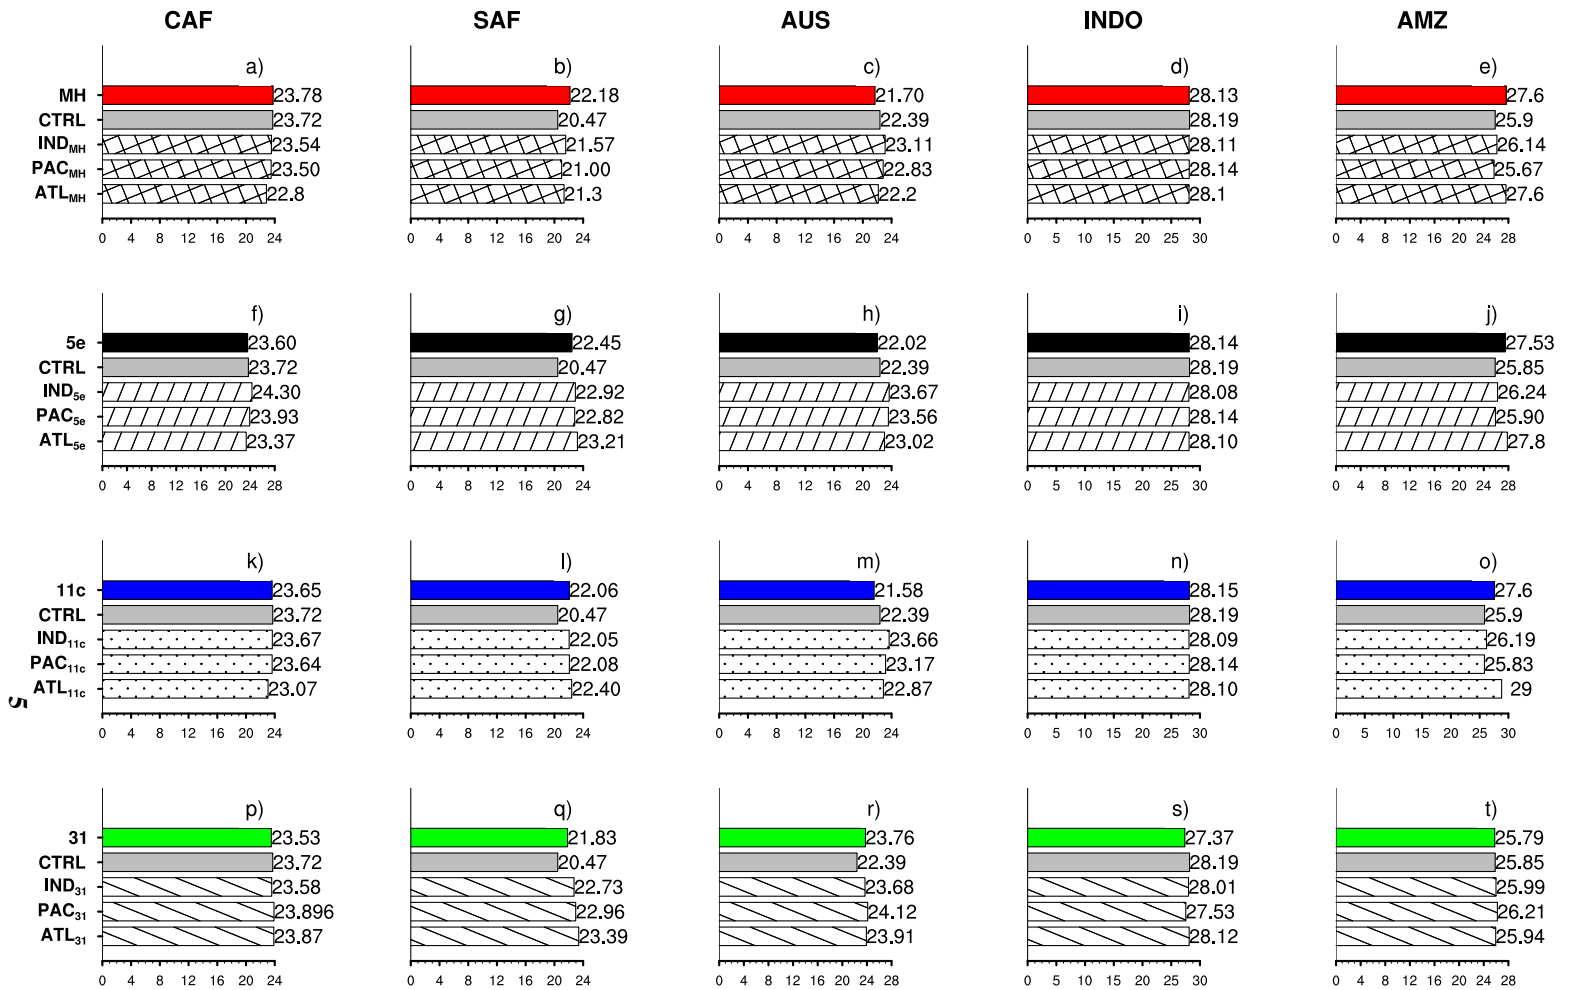

Figure S4. Areal averaged temperature (mm/day) CAF, SAF, AUS, IND and AMZ, region for the SST sensitivity experiments.

**Table S1.** Correlation coefficients of mean time series between the Niño3.4 index and the precipitations over areas of the tropical regional. Bold values indicate statistical significance at the 95% level.

|                          | MH           | MIS5e              | MIS11c | MIS31        |
|--------------------------|--------------|--------------------|--------|--------------|
| Austral<br>Summer (DJFM) |              |                    |        |              |
| Index                    |              | Niño <sub>34</sub> |        |              |
| Precipitation<br>Domain  |              |                    |        |              |
| CAF                      | <b>-0.39</b> | -0.24              | 0.34   | 0.12         |
| SAF                      | -0.24        | -0.12              | -0.11  | 0.13         |
| AUS                      | <b>-0.35</b> | -0.1               | 0.17   | <b>-0.47</b> |
| INDO                     | -0.23        | -0.14              | 0.29   | -0.25        |
| AMZ                      | -0.19        | -0.13              | -0.1   | 0.17         |

Table S2: Biome reconstructed for South America. Code biome: TRFO (Tropical rainforest); TSFO (Tropical seasonal forest); TDFO (Tropical dry forest); WTRF (Warm temperate rainforest); WEFO (Warm temperate evergreen broadleaf forest); CTRF (Cool temperate rainforest); WAMF (Warm temperate mixed forest); COMI (Cool mixed forest); CGSS (Cool grasslands); STEP (Steppe); DESE (Desert); CGSH (Cool grass shrublands).

| <b>Site</b>           | <b>Lat</b> | <b>Lon</b> | <b>Biome 6k</b> |
|-----------------------|------------|------------|-----------------|
| Lake Åsa3             | -62.62     | -61.13     | STEP            |
| Harberton             | -54.88     | -67.16     | CTRF            |
| Puerto del Hambre     | -53.59     | -70.92     | STEP            |
| La Misión             | -53.5      | -67.83     | CTRF            |
| Punta Arenas          | -53.15     | -70.97     | CTRF            |
| Meseta Latorre 1      | -51.52     | -72.05     | CGSH            |
| Meseta Latorre 2      | -51.44     | -72.03     | TDFO            |
| Torres del Paine      | -50.98     | -72.66     | COMI            |
| Dichan                | -49.66     | -73.88     | CTRF            |
| Puerto Eden           | -49.13     | -74.41     | CTRF            |
| Laguna Six Minutes    | -46.43     | -74.33     | CTRF            |
| Laguna Stibnite       | -46.43     | -74.43     | CGSH            |
| Laguna Stibnite       | -46.43     | -74.38     | CTRF            |
| Laguna Lincoln        | -45.34     | -74.07     | CTRF            |
| Laguna Lofel          | -44.85     | -74.43     | CTRF            |
| Estero Huitanque      | -43.61     | -73.82     | COMI            |
| Mayol                 | -42.64     | -73.75     | CTRF            |
| Puchilco              | -42.63     | -73.62     | CTRF            |
| Mallin Book           | -41.33     | -71.58     | CTRF            |
| Puerto Octay PM13     | -40.93     | -72.90     | CTRF            |
| Primavera             | -40.66     | -71.18     | TDFO            |
| Caunahue              | -40.00     | -72.00     | CTRF            |
| Salina Anzotegui      | -39.06     | -63.77     | STEP            |
| Cueva Haichol         | -38.58     | -70.66     | STEP            |
| Cerro La China        | -37.84     | -58.64     | TDFO            |
| Empalme Querandi´es   | -37.00     | -60.65     | TDFO            |
| Veranada Pelan        | -36.88     | -70.38     | TDFO            |
| Vaca Lauquen          | -36.83     | -71.08     | CGSH            |
| Veranada Vulkanpickel | -36.68     | -70.41     | TDFO            |

Continued on next page

**Table S2 – continued from previous page**

| <b>Site</b>         | <b>Lat</b> | <b>Lon</b> | <b>Biome 6k</b> |
|---------------------|------------|------------|-----------------|
| Salina 2            | -32.25     | -69.33     | STEP            |
| Serra do Rio Rastro | -28.55     | -49.55     | CGSH            |
| Morro da Igreja     | -28.18     | -49.86     | WTRF            |
| Serra da Boa Vista  | -27.70     | -49.15     | CTRF            |
| Rano Raraku Bore 3  | -27.16     | -109.28    | TDFO            |
| Rano Aroui          | -27.08     | -109.40    | CGSH            |
| Serra Campos Gerais | -24.66     | -50.21     | TDFO            |
| Aguilar             | -23.83     | -65.75     | STEP            |
| Rio da Curuá        | -23.83     | -48.83     | TRFO            |
| Tumbre 2            | -23.31     | -67.78     | STEP            |
| Aguas Calientas     | -23.08     | -67.42     | CGSH            |
| Lagoa da Caço       | -22.97     | -43.43     | TDFO            |
| Morro de Itapeva    | -22.78     | -45.63     | TDFO            |
| Salitre             | -19.00     | -46.78     | TDFO            |
| Lago do Pires       | -17.95     | -42.21     | TSFO            |
| Wasa Mayu           | -17.54     | -65.91     | CGSH            |
| Crominia            | -17.28     | -49.45     | TSFO            |
| Mt. Blanco          | -17.02     | -67.35     | CGSS            |
| Lake Huinãmarca     | -16.50     | -69.00     | CGSH            |
| Cerro Calvario      | -16.50     | -68.50     | CGSH            |
| Rio Kaluyo          | -16.43     | -68.13     | STEP            |
| Chacaltaya 1        | -16.36     | -68.13     | CGSH            |
| Cumre Unduavi       | -16.33     | -68.03     | CGSS            |
| Aguads Emendadas    | -15.56     | -47.58     | TSFO            |
| Amarete             | -15.23     | -68.98     | CGSH            |
| Cotapampa           | -15.21     | -69.11     | CGSH            |
| Katantica           | -14.8      | -69.18     | CGSH            |
| Laguna Chaplin      | -14.50     | -61.05     | TDFO            |
| Laguna Bella Vista  | -13.58     | -61.56     | TSFO            |
| Laguna Jeronimo     | -11.78     | -75.21     | CGSH            |
| Laguna Pomacocha    | -11.75     | -75.50     | CGSH            |
| Laguna Tuctua       | -11.66     | -75.00     | WTRF            |

Continued on next page



**Table S2 – continued from previous page**

| <b>Site</b>            | <b>Lat</b> | <b>Lon</b> | <b>Biome 6k</b> |
|------------------------|------------|------------|-----------------|
| Laguna Milloc          | -11.56     | -76.35     | CGSH            |
| Laguna Junin2          | -11.00     | -76.18     | COMI            |
| Laguna Huatacocha      | -10.76     | -76.55     | CGSH            |
| Rio São Francisco      | -10.46     | -43.00     | TSFO            |
| Saquinho               | -10.44     | -43.23     | WEFO            |
| Katira                 | -9.00      | -63.00     | TDFO            |
| Carajas                | -5.00      | -48.00     | TSFO            |
| Ciudad Universitaria X | -4.75      | -74.18     | WAMF            |
| Lake Surucucho         | -3.75      | -78.95     | WTRF            |
| Ayauch                 | -2.09      | -78.13     | TSFO            |
| Lago Crispim           | -0.8       | -48.00     | TSFO            |
| Lagoa da Curuça2       | -0.76      | -47.85     | TRFO            |
| Mariñame-II            | -0.66      | -72.03     | WTRF            |
| Monica-1               | -0.60      | -72.50     | TRFO            |
| Cayambe                | -0.03      | -78.03     | CGSH            |
| La Pata                | 0.25       | -66.66     | WTRF            |
| Lagoa das Patas        | 0.26       | -66.68     | TSFO            |
| Piusbi                 | 1.66       | -77.89     | TRFO            |
| Pitalito               | 1.75       | -76.50     | TSFO            |
| Piagua                 | 2.30       | -76.50     | WEFO            |
| Pantano de Genagra     | 2.50       | -76.50     | WEFO            |
| Rio Timbio             | 2.50       | -76.50     | WEFO            |
| Loma Linda             | 3.22       | -73.35     | TDFO            |
| Lago Agua Sucia        | 3.46       | -73.54     | STEP            |
| El Gobernador          | 3.95       | -75.00     | WTRF            |
| La Guitarra            | 4.00       | -74.28     | CTRF            |
| La Primavera           | 4.00       | -74.13     | COMI            |
| Carimagua              | 04.04      | -74.14     | CGSS            |
| La Rabona              | 04.05      | -74.25     | CTRF            |
| El Piñal               | 04.09      | -70.40     | TDFO            |
| Alsacia                | 04.09      | -74.11     | COMI            |
| Andabobos              | 04.09      | -74.15     | CGSH            |

Continued on next page

**Table S2 – continued from previous page**

| <b>Site</b>            | <b>Lat</b> | <b>Lon</b> | <b>Biome 6k</b> |
|------------------------|------------|------------|-----------------|
| De la América          | 4.33       | -74.00     | CTRF            |
| Laguna Angel           | 4.45       | -70.54     | TDFO            |
| Libano                 | 4.50       | -75.50     | COMI            |
| de Pedro Palo III      | 4.50       | -74.41     | WTRF            |
| Paramo Palacio         | 4.76       | -73.88     | CGSH            |
| Greja                  | 4.86       | -73.70     | CGSH            |
| Sardinas               | 4.95       | -69.45     | TDFO            |
| Herrera                | 5.00       | -73.91     | COMI            |
| Agua Blanca            | 5.0        | -74.45     | CTRF            |
| El Abra II             | 05.02      | -73.96     | CTRF            |
| Paramo de Peña Negra   | 05.09      | -74.09     | COMI            |
| ODP site 932           | 5.18       | -47.03     | WTRF            |
| Comprida               | 5.18       | -47.63     | TRFO            |
| Geral                  | 5.18       | -47.53     | TRFO            |
| Paramo de Laguna Verde | 5.25       | -74.00     | CGSH            |
| Fúquene II             | 5.50       | -73.87     | CTRF            |
| Ciénaga del Visitador  | 6.13       | -72.83     | CGSH            |
| Valle de Lagunillas    | 6.50       | -72.34     | CTRF            |
| La Chonta              | 8.00       | -82.00     | COMI            |
| La Yeguada,            | 8.43       | -80.78     | TSFO            |
| Valle Laguna Victoria  | 8.80       | -70.79     | CGSH            |
| Paramo de Miranda      | 8.91       | -70.85     | CGSH            |
| Panama                 | 9.00       | -80.87     | TSFO            |
| Paramo Piedras Blancas | 9.16       | -70.83     | CGSH            |
| Lago de las Morrenas   | 9.50       | -83.49     | CTRF            |
| Lake Valencia          | 10.32      | -67.75     | TDFO            |
| Lago Quexil            | 16.92      | -89.88     | WEFO            |
| Lake Peten-Itza        | 17.25      | -90.00     | WEFO            |
| Quila                  | 19.30      | -99.20     | WAMF            |
| Lake Texcoco           | 19.44      | -99.12     | WAMF            |
| Chalco Lake            | 19.50      | -99.00     | WAMF            |
| Lake Pátzcuaro         | 19.58      | -101.58    | WAMF            |

Continued on next page

**Table S2 – continued from previous page**

| <b>Site</b>        | <b>Lat</b> | <b>Lon</b> | <b>Biome 6k</b> |
|--------------------|------------|------------|-----------------|
| San Jose Chulchaca | 20.86      | -90.13     | WEFO            |
| Lake Coba          | 20.86      | -87.55     | WEFO            |
